# Supplementary material
Source: Springer Nature journal article supplement (https://www.springermedizin.de/resource/supplementary/12955_2008_456_MOESM1_ESM.pdf/9560492)

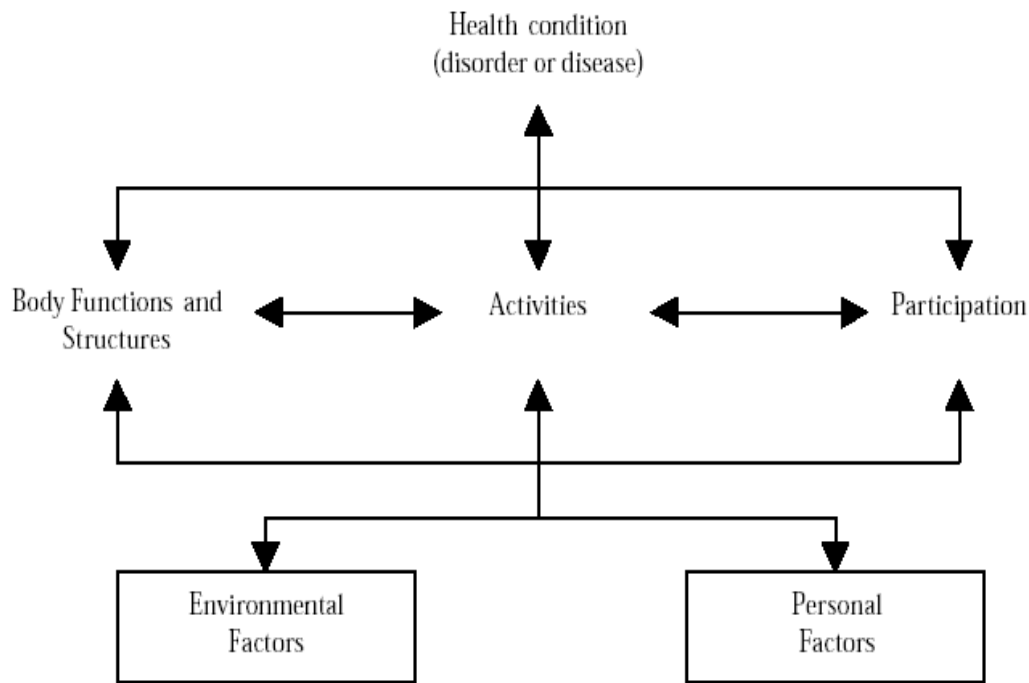

Supplement: MOESM1 [file 9560492]
